# Supplementary material for: Seasonal deposition processes and chronology of a varved Holocene lake sediment record from Lake Chatyr Kol (Kyrgyz Republic)
Source: Copernicus journal article supplement (doi:10.5194/gchron-2019-18), 2020-01-20
Supplement: Supplementary file 1 [file gchron-2019-18-supplement.pdf]

# Supplement

## Figures

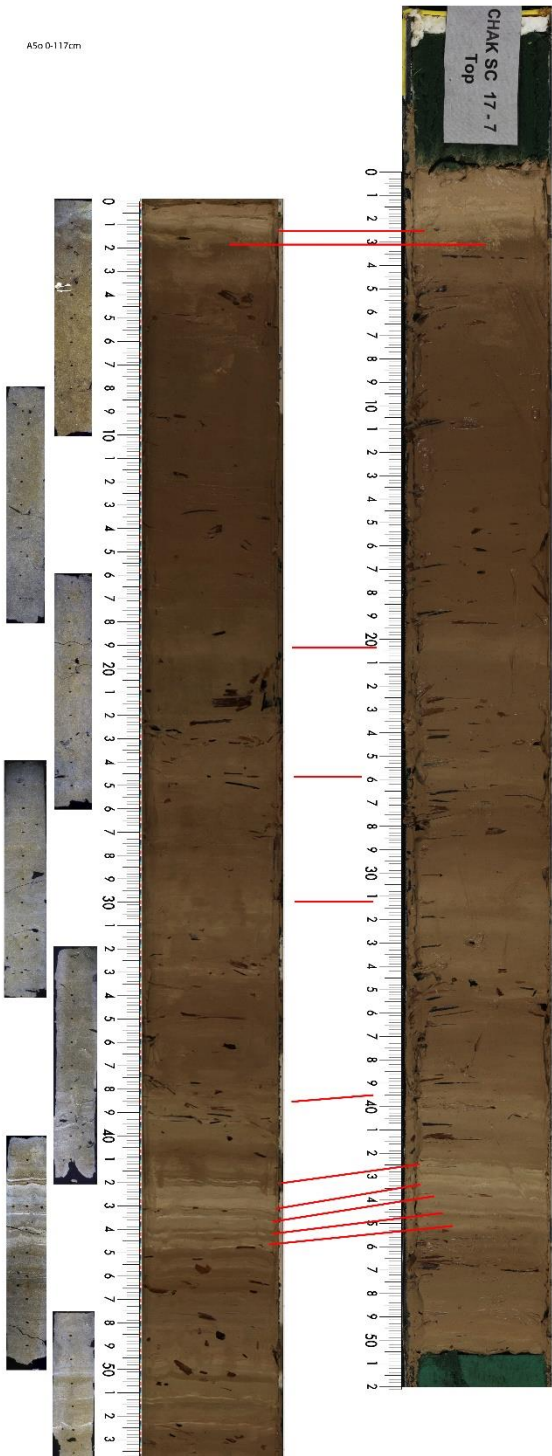

Suppl. Fig. 1 Correlation of SC17\_7 (right) with the top of the composite profile CHAT12 (left): Red lines signify marker layers. Dotted red lines indicate slightly calcitic enriched intervals. Thin sections are displayed next to the composite.

Suppl. Tab. 1 Gamma spectrometry results. count unc. = count uncertainty, \* not used for CRS model calculations.

|           |       | keV                  |         | 661.66 |                   | 46.54             |                   | 295.24            |                   | 351.93            |                   |                   |                   |                                   |                                     |        |  |
|-----------|-------|----------------------|---------|--------|-------------------|-------------------|-------------------|-------------------|-------------------|-------------------|-------------------|-------------------|-------------------|-----------------------------------|-------------------------------------|--------|--|
|           |       | Abundance            |         | 0.851  |                   | 0.0425            |                   | 0.185             |                   | 0.358             |                   |                   |                   |                                   |                                     |        |  |
|           |       | Efficiency G1        |         | 0.163  |                   | 0.6056            |                   | 0.3626            |                   | 0.3217            |                   |                   |                   |                                   |                                     |        |  |
|           |       | Efficiency G2        |         | 0.176  |                   | 0.6638            |                   | 0.3942            |                   | 0.3319            |                   |                   |                   |                                   |                                     |        |  |
| Composite | Depth | DD                   | m       | Det    | t <sub>mess</sub> | <sup>137</sup> Cs | <sup>137</sup> Cs | <sup>210</sup> Pb | <sup>210</sup> Pb | <sup>214</sup> Pb | <sup>214</sup> Pb | <sup>214</sup> Pb | <sup>214</sup> Pb | <sup>210</sup> Pb <sub>supp</sub> | <sup>210</sup> Pb <sub>unsupp</sub> | Sample |  |
| Depth     | (cm)  | (g/cm <sup>3</sup> ) | (g)     |        | (d)               | (mBq/g)           | count             | (mBq/g)           | count             | (mBq/g)           | count             | (mBq/g)           | count             | (mBq/g)                           | (mBq/g)                             | Number |  |
| (cm)      | Core  |                      |         |        |                   |                   | unc.              |                   | unc.              |                   | unc.              |                   | unc.(%)           |                                   |                                     |        |  |
| 17-7      | SC    |                      |         |        |                   |                   | (%)               |                   | (%)               |                   | (%)               |                   |                   |                                   |                                     |        |  |
| -1.0      | 0.25  | 0.164                | 1.04366 | G1     | 3.06              | 53.6              | 2.6               | 512.4             | 2.2               | 12.2              | 11.0              | 15.5              | 5.5               | 13.9                              | 498.6                               | 1      |  |
| -0.5      | 0.75  | 0.294                | 1.12885 | G1     | 3.79              | 49.3              | 2.2               | 424.1             | 2.1               | 22.5              | 5.9               | 18.8              | 2.5               | 20.6                              | 403.5                               | 2      |  |
| 0.0       | 1.25  | 0.319                | 1.06359 | G2     | 3.06              | 47.3              | 2.9               | 264.4             | 3.4               | 16.8              | 8.3               | 13.0              | 6.0               | 14.9                              | 249.5*                              | 3      |  |
| 0.0       | 1.25  | 0.319                | 1.06359 | G1     | 6.99              | 48.4              | 1.8               | 308.1             | 2.1               | 13.2              | 6.0               | 13.4              | 4.2               | 13.3                              | 294.8                               | 4      |  |
| 0.5       | 1.75  | 0.207                | 1.02092 | G1     | 2.70              | 65.1              | 2.5               | 259.7             | 3.5               | 20.5              | 7.8               | 19.5              | 5.3               | 20.0                              | 239.7                               | 5      |  |
| 1.0       | 2.25  | 0.156                | 1.08748 | G2     | 3.17              | 97.6              | 1.7               | 266.2             | 3.1               | 25.9              | 5.9               | 17.8              | 5.1               | 21.8                              | 244.4                               | 6      |  |
| 1.5       | 2.75  | 0.138                | 1.02426 | G1     | 3.85              | 162.1             | 1.2               | 279.6             | 3.0               | 25.0              | 7.8               | 26.9              | 4.5               | 26.0                              | 253.6                               | 7      |  |
| 2.0       | 3.25  | 0.135                | 1.02441 | G1     | 3.14              | 209.0             | 1.2               | 253.4             | 3.7               | 27.2              | 7.4               | 30.3              | 4.2               | 28.7                              | 224.7                               | 8      |  |
| 2.5       | 3.75  | 0.147                | 1.14065 | G1     | 1.98              | 236.1             | 1.3               | 251.8             | 4.6               | 34.5              | 6.9               | 32.1              | 4.8               | 33.3                              | 218.5*                              | 9      |  |
| 2.5       | 3.75  | 0.147                | 1.14065 | G2     | 5.02              | 236.3             | 0.8               | 217.3             | 2.8               | 28.8              | 5.3               | 30.9              | 3.3               | 29.8                              | 187.5                               | 10     |  |
| 3.0       | 4.25  | 0.144                | 1.18116 | G2     | 2.00              | 266.4             | 1.2               | 195.5             | 5.4               | 32.2              | 7.4               | 26.7              | 6.1               | 29.5                              | 166.0                               | 11     |  |
| 3.5       | 4.75  | 0.107                | 1.06028 | G2     | 4.89              | 302.7             | 0.7               | 196.8             | 3.6               | 30.6              | 51.7              | 33.1              | 4.0               | 31.9                              | 165.0                               | 12     |  |
| 4.0       | 5.25  | 0.112                | 1.00751 | G1     | 3.16              | 295.8             | 1.0               | 202.8             | 4.5               | 40.5              | 5.3               | 36.3              | 3.7               | 38.4                              | 164.4*                              | 13     |  |
| 4.0       | 5.25  | 0.112                | 1.00751 | G1     | 4.18              | 296.3             | 0.9               | 215.6             | 3.5               | 40.4              | 4.5               | 34.6              | 3.2               | 37.5                              | 178.1*                              | 14     |  |
| 4.0       | 5.25  | 0.112                | 1.00751 | G2     | 6.73              | 300.3             | 0.7               | 185.5             | 4.3               | 33.7              | 4.7               | 35.3              | 3.1               | 34.5                              | 151.0                               | 15     |  |
| 4.5       | 5.75  | 0.132                | 1.08969 | G1     | 2.94              | 259.5             | 1.1               | 182.8             | 5.0               | 32.0              | 6.4               | 36.6              | 3.7               | 34.3                              | 148.5                               | 16     |  |
| 5.0       | 6.25  | 0.146                | 1.04027 | G2     | 3.17              | 202.3             | 1.2               | 187.6             | 4.4               | 36.0              | 5.9               | 41.8              | 3.8               | 38.9                              | 148.7                               | 17     |  |
| 5.5       | 6.75  | 0.137                | 1.0732  | G1     | 2.98              | 133.1             | 1.5               | 174.8             | 4.6               | 38.4              | 5.5               | 35.9              | 3.6               | 37.1                              | 137.7*                              | 18     |  |
| 5.5       | 6.75  | 0.137                | 1.0732  | G2     | 4.20              | 136.7             | 1.2               | 180.7             | 5.0               | 37.0              | 5.5               | 35.4              | 3.5               | 36.2                              | 144.5                               | 19     |  |
| 6.0       | 7.25  | 0.169                | 0.98522 | G1     | 1.84              | 93.2              | 2.5               | 171.7             | 6.4               | 46.8              | 6.5               | 32.3              | 5.2               | 39.6                              | 132.1*                              | 20     |  |
| 6.0       | 7.25  | 0.169                | 0.98522 | G2     | 3.85              | 95.8              | 1.7               | 154.6             | 5.1               | 32.6              | 6.8               | 39.7              | 3.5               | 36.1                              | 118.5*                              | 21     |  |
| 6.0       | 7.25  | 0.169                | 0.98522 | G2     | 6.99              | 94.8              | 1.3               | 161.8             | 4.6               | 41.2              | 3.9               | 43.2              | 2.4               | 42.2                              | 119.6                               | 22     |  |
| 6.5       | 7.75  | 0.140                | 1.04013 | G2     | 2.95              | 65.8              | 2.4               | 145.7             | 6.2               | 41.3              | 4.9               | 40.4              | 3.3               | 40.9                              | 104.9*                              | 23     |  |
| 6.5       | 7.75  | 0.140                | 1.04013 | G1     | 4.90              | 62.3              | 1.9               | 151.7             | 4.4               | 42.4              | 3.8               | 37.8              | 2.8               | 40.1                              | 111.6                               | 24     |  |
| 7.0       | 8.25  | 0.132                | 0.97056 | G2     | 2.97              | 51.8              | 2.9               | 134.0             | 7.1               | 45.7              | 5.5               | 39.1              | 3.8               | 42.4                              | 91.6*                               | 25     |  |
| 7.0       | 8.25  | 0.132                | 0.97056 | G1     | 3.15              | 48.9              | 2.7               | 135.1             | 5.6               | 45.8              | 4.8               | 38.8              | 3.5               | 42.3                              | 92.8                                | 26     |  |

| Composite<br>Depth<br>(cm) | Depth<br>(cm)<br>Core<br>SC<br>17-7 | DD<br>(g/cm <sup>3</sup> ) | m<br>(g) | Det | t <sub>mess</sub><br>(d) | <sup>137</sup> Cs<br>(mBq/g) | <sup>137</sup> Cs<br>count<br>unc.<br>(%) | <sup>210</sup> Pb<br>(mBq/g) | <sup>210</sup> Pb<br>count<br>unc.<br>(%) | <sup>214</sup> Pb<br>(mBq/g) | <sup>214</sup> Pb<br>count<br>unc.<br>(%) | <sup>214</sup> Pb<br>(mBq/g) | <sup>214</sup> Pb<br>count<br>unc.(%) | <sup>210</sup> Pb <sub>supp</sub><br>(mBq/g) | <sup>210</sup> Pb <sub>unsupp</sub><br>(mBq/g) | Sample<br>Number |
|----------------------------|-------------------------------------|----------------------------|----------|-----|--------------------------|------------------------------|-------------------------------------------|------------------------------|-------------------------------------------|------------------------------|-------------------------------------------|------------------------------|---------------------------------------|----------------------------------------------|------------------------------------------------|------------------|
| 7.5                        | 8.75                                | 0.168                      | 1.13756  | G2  | 2.71                     | 41.7                         | 2.9                                       | 124.6                        | 5.7                                       | 38.9                         | 6.0                                       | 41.9                         | 3.5                                   | 40.4                                         | 84.2*                                          | 27               |
| 7.5                        | 8.75                                | 0.168                      | 1.13756  | G1  | 2.91                     | 38.9                         | 3.0                                       | 134.6                        | 6.2                                       | 39.1                         | 4.9                                       | 37.2                         | 3.3                                   | 38.1                                         | 96.5                                           | 28               |
| 8.0                        | 9.25                                | 0.148                      | 1.15022  | G2  | 2.99                     | 26.6                         | 3.7                                       | 89.1                         | 8.0                                       | 36.9                         | 5.2                                       | 40.4                         | 3.1                                   | 38.6                                         | 65.5                                           | 29               |
| 8.5                        | 9.75                                | 0.116                      | 1.07792  | G1  | 2.16                     | 16.9                         | 6.4                                       | 95.0                         | 10.0                                      | 46.1                         | 5.4                                       | 41.8                         | 4.0                                   | 43.9                                         | 51.5                                           | 30               |
| 9.0                        | 10.25                               | 0.138                      | 1.04675  | G1  | 4.08                     | 12.5                         | 6.2                                       | 97.0                         | 8.6                                       | 44.6                         | 4.6                                       | 37.4                         | 3.3                                   | 41.0                                         | 56.1*                                          | 31               |
| 9.0                        | 10.25                               | 0.138                      | 1.04675  | G1  | 6.73                     | 14.3                         | 4.8                                       | 88.4                         | 6.0                                       | 42.1                         | 3.6                                       | 40.8                         | 2.7                                   | 41.5                                         | 46.9                                           | 32               |
| 9.5                        | 10.75                               | 0.106                      | 1.06813  | G2  | 2.16                     | 10.8                         | 8.1                                       | 84.3                         | 9.9                                       | 34.9                         | 7.1                                       | 39.2                         | 3.9                                   | 37.1                                         | 47.2                                           | 33               |
| 10.0                       | 11.25                               | 0.131                      | 0.9888   | G1  | 3.98                     | 9.7                          | 9.1                                       | 79.9                         | 7.9                                       | 43.1                         | 7.9                                       | 38.2                         | 3.4                                   | 40.7                                         | 39.3                                           | 34               |
| 10.0                       | 11.25                               | 0.131                      | 0.9888   | G1  | 3.81                     | 7.1                          | 12.0                                      | 75.5                         | 8.1                                       | 37.2                         | 8.1                                       | 39.2                         | 3.0                                   | 38.2                                         | 37.3*                                          | 35               |
| 10.5                       | 11.75                               | 0.156                      | 1.18173  | G2  | 2.91                     | 7.0                          | 11.2                                      | 72.0                         | 8.4                                       | 39.0                         | 8.4                                       | 38.0                         | 3.4                                   | 38.5                                         | 33.5                                           | 36               |
| 11.0                       | 12.25                               | 0.168                      | 1.08336  | G2  | 4.09                     | 4.2                          | 15.7                                      | 63.8                         | 8.0                                       | 36.7                         | 8.0                                       | 39.8                         | 3.1                                   | 38.2                                         | 25.6                                           | 37               |
| 11.5                       | 12.75                               | 0.146                      | 1.14027  | G1  | 3.95                     | 4.5                          | 14.6                                      | 68.4                         | 9.0                                       | 38.9                         | 9.0                                       | 37.5                         | 2.9                                   | 38.2                                         | 30.2                                           | 38               |
| 12.0                       | 13.25                               | 0.183                      | 0.95955  | G1  | 2.88                     | 3.7                          | 26.9                                      | 64.0                         | 11.0                                      | 46.8                         | 11.0                                      | 41.1                         | 4.0                                   | 44.0                                         | 20.0                                           | 39               |
| 12.5                       | 13.75                               | 0.154                      | 1.28248  | G1  | 3.78                     | 3.7                          | 16.4                                      | 69.2                         | 9.6                                       | 39.5                         | 9.6                                       | 39.3                         | 2.7                                   | 39.4                                         | 29.7                                           | 40               |
| 13.0                       | 14.25                               | 0.154                      | 0.98268  | G2  | 7.93                     | 3.2                          | 17.9                                      | 49.6                         | 7.7                                       | 41.7                         | 7.7                                       | 46.4                         | 2.1                                   | 44.1                                         | 5.5                                            | 41               |
| 13.5                       | 14.75                               | 0.112                      | 1.09286  | G2  | 2.99                     | 3.3                          | 16.5                                      | 51.9                         | 11.9                                      | 40.8                         | 11.9                                      | 37.7                         | 3.4                                   | 39.3                                         | 12.6                                           | 42               |

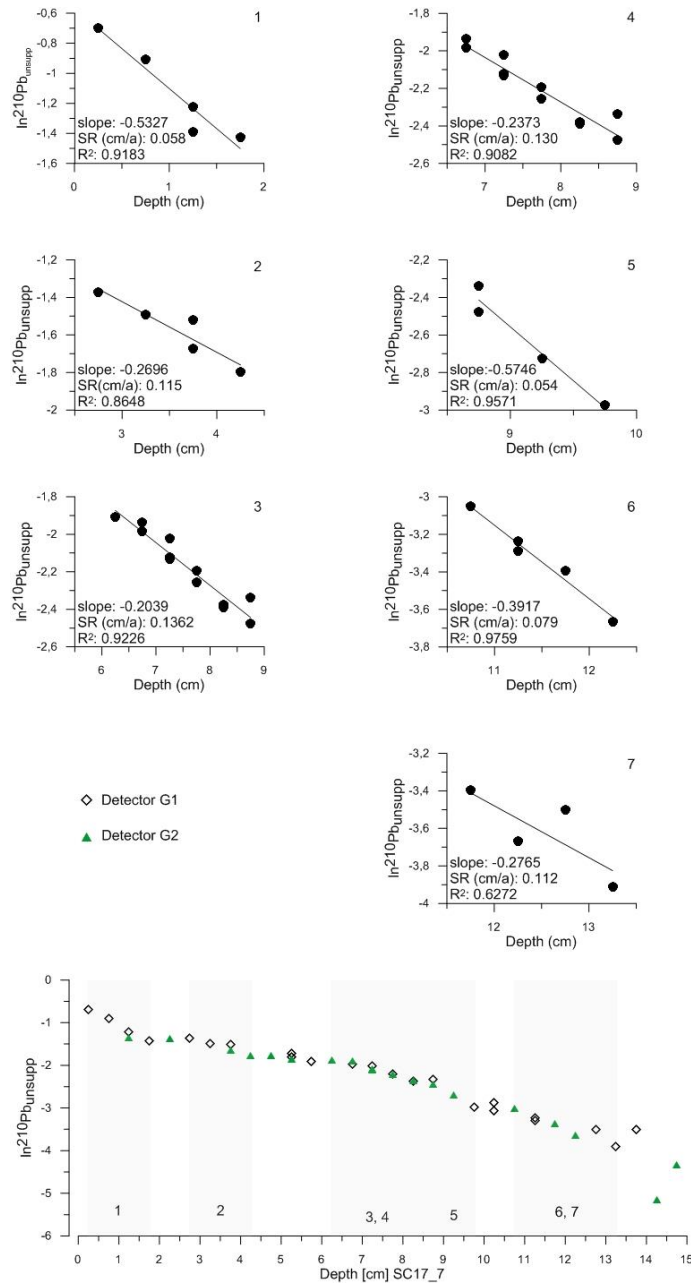

Suppl. Fig. 2  $\ln^{210}\text{Pb}_{\text{unsupp}}$  vs depth plot and depth sequences used to calculate sedimentation rates for the CIC model. Light grey bars indicate the used sequences. White square= Detector G1, green triangles= Detector G2.

Suppl. Tab. 2 Age determination by used depth sequences of  $\ln^{210}\text{Pb}_{\text{unSUPP}}$ . The CIC model assumes equal initial concentrations of  $^{210}\text{Pb}_{\text{unSUPP}}$  in the sediment regardless of the mass flux at the coring site (c.f. Appleby, 2002). Intercalated sediment sections showed nearly uncorrelated  $\ln(^{210}\text{Pb}_{\text{unSUPP}})$  vs. depth relationships between 10.25-9.25, 6.25-4.25, 2.25-1.75 cm depth (Suppl. Fig. 2). Therefore, the initial  $^{210}\text{Pb}_{\text{unSUPP}}$  activities of samples that bridged these sections were additionally used to determine time intervals between these samples (italic sequences). We further constrained the CIC model to the  $^{137}\text{Cs}$  peak at 5.25 cm depth, located within an uncorrelated  $\ln(^{210}\text{Pb}_{\text{unSUPP}})$  vs. depth section between 6.25-4.25 cm depth, assuming it represents the AD 1963 peak of atmospheric nuclear weapon tests.

| Marker/<br>Depth<br>(cm)         | Age<br>Marker | Seq.<br>No. | from | to   | delta<br>_x<br>(cm) | slope   | SR<br>(cm/a) | delta t<br>(a) | R <sup>2</sup> | Dated depths<br>in SC17_7 | Comment                                        |
|----------------------------------|---------------|-------------|------|------|---------------------|---------|--------------|----------------|----------------|---------------------------|------------------------------------------------|
| 0.25                             | 2015          |             |      |      |                     |         |              |                |                |                           | Assumed rel. to top = 2017                     |
| 1.75                             | -             | 1           | 0.25 | 1.75 | 1,5                 | -0.5327 | 0.0583       | 25.7           | 0.9183         | 1.75=1989.3               | Calc rel to top (2015-25.7 a)                  |
| 2.25                             | -             | -           | 0.25 | 2.25 | 2                   | -       | 0,0872       | 22,9           | -              | 2.25=1992,1               | calc rel Top (2015-22,9)                       |
| 5.25 –<br><sup>137</sup> Cs peak | 1963 ?        |             |      |      |                     |         |              |                |                |                           | Assuming that <sup>137</sup> Cs peak = AD 1963 |

|                                         |      |   |       |       |     |         |        |      |        |                |                                                                                |
|-----------------------------------------|------|---|-------|-------|-----|---------|--------|------|--------|----------------|--------------------------------------------------------------------------------|
| 2.25                                    | -    | - | 2.25  | 4.25  | 2   | -0.1943 | 0.1600 | 12.5 | 0.7793 | 2.25=1976.1    | Cal rel to 4.25=1963.6                                                         |
| 2.75                                    | -    | 2 | 2.75  | 4.25  | 1.5 | -0.2696 | 0.1153 | 13,0 | 0.8648 | 2.75=1976.6    | Cal rel to 4.25=1963.6                                                         |
| 2.75                                    | -    | - | 2.75  | 4.25  | 1.5 | -0,2094 | 0.107  | 14   | 0.9933 | 2.75=1977.6    | Cal rel to 4.25=1963.6 (without Nr 9)                                          |
| 3.25                                    | -    | - | 3.25  | 5.25  | 2   | -       | 0,1989 | 10,1 | -      | 3.25=1973,1    | Cal rel to 4.25=1963.6                                                         |
| 4.25                                    | -    | - | 4.25  | 5.25  | 1   | -0,0098 | 3.1717 | 0.6  | 0,978  | 4.25=1963.6    | Cal rel to 5.25=1963, ~flat sequence                                           |
| 4.25                                    | -    | - | 4.25  | 5.25  | 1   | -       | 3.1647 | 0.3  | -      | 4.25=1963.3    | Cal rel to 5.25=1963, ~flat sequence                                           |
| 5.75                                    | -    | - | 4.25  | 5.75  | 1.5 | -0,0677 | 0.4591 | 3.3  | 0.6723 | 5.75=1960.3    | without Nr 14 & 15                                                             |
| 5.75                                    | -    | - | 5.25  | 5.75  | 0.5 | -       | 0.1527 | 3.3  | -      | 5.75=1959,7    | Cal rel to 5.25=1963                                                           |
| 5.75                                    | -    | - | 5.75  | 8.75  | 3   | -02093  | 0.1485 | 20.2 | 0.9038 | 8.75=1939.5    | Cal rel to 5.75=1959.7                                                         |
| 6.25                                    | -    | - | 5.25  | 6.25  | 2   | -       | 0.6196 | 1.8  | -      | 6.25= 1957.9   | Cal rel to 5.75=1959.7                                                         |
| 8.75                                    | -    | 3 | 6.25  | 8.75  | 2.5 | -0.2282 | 0.1362 | 18.4 | 0.9226 | 8.75= 1939.5   | Cal rel to 6.25= 1957.9                                                        |
| 8.25                                    | -    | - | 5.75  | 8.25  | 3,0 | -       | 0,1958 | 15.3 | -      | 8.25=1944,4    | Cal rel to 5.75=1959.7                                                         |
| 8.75                                    | -    | - | 5.25  | 8.75  | 3,5 | -       | 0,1817 | 17,1 | -      | 8.75=1945.9    | Only 5.25 (G1; <sup>210</sup> Pb <sub>unSUPP</sub> =164.4 mBq/g) and 8,75 (G1) |
| 8.75 – Onset <sup>137</sup> Cs increase | 1945 |   |       |       |     |         |        |      |        | 8.75=1945.9    |                                                                                |
| 7.25                                    | -    | - | 7.25  | 8.75  | 1.5 | -       | 0.1495 | 10   | -      | 7.25=1955.9    | Cal. rel. to 8.75=1945.9                                                       |
| 9.75                                    | -    | 5 | 8.75  | 9.75  | 1   | -0,5746 | 0,0541 | 18.5 | 0,9571 | 9.75=1927.4    | Slope change at 8.75, cal. rel. to 8.75=1945.9                                 |
| 10.75                                   | -    | - | 8.75  | 10,75 | 2   | -       | 0.0963 | 20.8 | -      | 10.75=1925.1   | ~flat seq. between 9.75 and 10.25                                              |
| 11,75                                   | -    | - | 8.75  | 11,75 | 3   | -       | 0.0942 | 31,9 | -      | 11.75 = 1914   | ~flat seq. between 9.75 and 10.25                                              |
| 12,25                                   | -    | 6 | 10,75 | 12,25 | 1.5 | -0,3917 | 0,0794 | 18,9 | 0,9759 | 12.25 = 1906.2 | cal. rel. to 10.75=1925.1.                                                     |
| 13,25                                   | -    | 7 | 11.75 | 13.25 | 1.5 | -0,2765 | 0,1124 | 13,3 | 0,6272 | 13.25=1900.7   | cal. rel. to 11.75=1914                                                        |
| 13.25                                   | -    | - | 12.25 | 13.25 | 1   | -       | 0,1267 | 7,9  | -      | 13.25 = 1898.3 | cal. rel. to 12.25=1906.2                                                      |
| 13.75                                   | -    | - | 12,25 | 13.75 | -   | -       | 0,3093 | 4,8  | -      | 13.75=1901.4   | cal. rel.to 12.25=1906.2                                                       |
| 14.75                                   | -    | - | 12.25 | 14.75 | 2.5 | -       | 0,1103 | 22,7 | -      | 14.75 = 1883.5 | cal. rel.to 12.25=1906.2                                                       |

Supp. Tab. 3) Comparison of CIC and CRS model chronologies, calculated sedimentation rates (cm/a) and mass acc. rates (g/cm<sup>2</sup>/a). Data based on Suppl. Tab. 1 & 2.

| Depth<br>SC17_7<br>(cm) | Composite<br>depth (cm) | *CIC-<br>Model Age | SR (cm/a)<br>CIC Model | *CRS-Model age | SR (cm/a)<br>CRS Model | mass acc.<br>rate (g/cm <sup>2</sup> /a) |
|-------------------------|-------------------------|--------------------|------------------------|----------------|------------------------|------------------------------------------|
| 0.25                    | -1.0                    | 2015               | 0.06                   | 2015           | 0.14                   | 0.022                                    |
| 0.75                    | -0.5                    | -                  | 0.06                   | 2010           | 0.08                   | 0.024                                    |
| 1.25                    | 0.0                     | -                  | 0.06                   | 2004           | 0.09                   | 0.027                                    |
| 1.75                    | 0.5                     | 1989.3             | 0.06                   | 1999           | 0.13                   | 0.027                                    |
| 2.25                    | 1.0                     | 1976.1             | 0.16                   | 1996           | 0.15                   | 0.024                                    |
| 2.75                    | 1.5                     | 1976.6             | 0.12                   | 1993           | 0.15                   | 0.020                                    |
| 3.25                    | 2.0                     | 1973.1             | 0.12                   | 1989           | 0.15                   | 0.021                                    |
| 3.75                    | 2.5                     | -                  | 0.12                   | 1986           | 0.15                   | 0.022                                    |
| 4.25                    | 3.0                     | -                  | 0.12                   | 1983           | 0.16                   | 0.023                                    |
| 4.75                    | 3.5                     | -                  | -                      | 1980           | 0.19                   | 0.020                                    |
| 5.25                    | 4.0                     | 1963               | -                      | 1977           | 0.18                   | 0.021                                    |
| 5.75                    | 4.5                     | 1959.7             | 0.15                   | 1974           | 0.15                   | 0.019                                    |
| 6.25                    | 5.0                     | -                  | 0.15                   | 1970           | 0.12                   | 0.017                                    |
| 6.75                    | 5.5                     | 1961.2             | 0.13                   | 1966           | 0.11                   | 0.015                                    |
| 7.25                    | 6.0                     | 1955.9             | 0.13                   | 1961           | 0.09                   | 0.016                                    |
| 7.75                    | 6.5                     | -                  | 0.13                   | 1956           | 0.10                   | 0.014                                    |
| 8.25                    | 7.0                     | -                  | 0.13                   | 1951           | 0.11                   | 0.014                                    |
| 8.75                    | 7.5                     | 1945.9             | 0.13                   | 1945           | 0.07                   | 0.012                                    |
| 9.25                    | 8.0                     | -                  | 0.05                   | 1939           | 0.09                   | 0.013                                    |
| 9.75                    | 8.5                     | 1927.4             | 0.05                   | 1934           | 0.12                   | 0.014                                    |
| 10.25                   | 9.0                     | -                  | -                      | 1929           | 0.10                   | 0.014                                    |
| 10.75                   | 9.5                     | 1925.1             | 0.08                   | 1924           | 0.11                   | 0.011                                    |
| 11.25                   | 10.0                    | -                  | 0.08                   | 1919           | 0.09                   | 0.012                                    |
| 11.75                   | 10.5                    | 1914               | 0.08                   | 1913           | 0.07                   | 0.011                                    |
| 12.25                   | 11.0                    | 1906.2             | 0.08                   | 1906           | 0.07                   | 0.012                                    |
| 12.75                   | 11.5                    | -                  | 0.11                   | 1898           | 0.05                   | 0.008                                    |
| 13.25                   | 12.0                    | 1900.7             | 0.11                   | 1887           | 0.04                   | 0.008                                    |
| 13.75                   | 12.5                    | -                  | -                      | 1871           | 0.02                   | 0.004                                    |
| 14.25                   | 13.0                    | -                  | -                      | 1854           | 0.04                   | 0.006                                    |
| 14.75                   | 13.5                    | 1883.5             | -                      | 1832           | 0.02                   | 0.002                                    |
